# Supplementary material for: Proteomic Profiles of Cotton Fiber Developmental Transition from Cell Elongation to Secondary Wall Deposition
Source: Preprints.org preprint supplement (doi:10.20944/preprints201904.0259.v1), 2019-04-23
Supplement: Supplementary file 4 [file supplementary]

## Sheet: Sheet1
	Protein No.		NCBI accession no.	Protein name	Functional classification					Gh		Gb		Gh		Gb		Gh		Gb
		Molecular Function			Molecular Function		feilei	Biological process	Cellular component	15-19 dpa		15-19 dpa		19-23 dpa		19-23 dpa		23-27dpa		23-27 dpa
										Up-regulated	Down-regulated	Up-regulated	Down-regulated	Up-regulated	Down-regulated	Up-regulated	Down-regulated	Up-regulated	Down-regulated	Up-regulated	Down-regulated
25	64	Transport process	A0A1U8LGE5	Mitochondrial dicarboxylate/tricarboxylate transporter (DTC)	Tansporter activity	4	Tr	Transport process	Integral component of membrane					1.59
	19		A0A1U8ID75	Vesicle-fusing ATPase-like	ATP binding	4	Tr	Transport process	Integral component of membrane						0.65	1.77
	21		A0A1U8IZZ5	Importin-5-like	GTPase binding	4	Tr	Transport process	Intracellular			1.81						1.98
	51		A0A1U8PLL6	Vacuolar protein sorting-associated protein 52 A-like isoform X2	Rab GTPase binding	4	Tr	Transport process	Cytoplasm											1.39
8	101	Signal transduction process	F8TRV3	14-3-3-like protein 2	Protein domain specific binding	7	Sn	Signal transduction process		2.66		1.96			0.63						0.62
	7		B1NHU5	Fasciclin-like arabinogalactan protein 1(FLAs1)	Protein binding	7	Sn	Signal transduction process							0.61	2.8				3.3
	8		A0A1U8IIZ3	Sulfurtransferase	Thiosulfate sulfurtransferase activity	7	Sn	Signal transduction process			0.51			1.52			0.62
	17		A0A1U8I6P0	ERBB-3 Binding protein 1	Protein binding	7	Sn	Signal transduction process							0.61						0.57
	39		A0A1U8MRN1	STS14 protein-like	Protein binding	7	Sn	Signal transduction process							0.53
	40		A0A1U8MZI6	Guanosine nucleotide diphosphate dissociation inhibitor(GDI)	Rab GDP-dissociation inhibitor activity	7	Sn	Signal transduction process	Intracellular		0.54		0.59	1.82			0.62
	42		A0A1U8N0D2	Ras-related protein RABA1f-like	GTP binding	7	Sn	Signal transduction process			0.50										0.52
43	1	Secondary metabolism process	A0A1U8IHV5	Shikimate O-hydroxycinnamoyltransferase-like(HCTL)	Transferring acyl groups other than amino-acyl groups	6	Se	Secondary metabolism process							0.61				0.56		0.56
38	2		A0A1U8JD61	Anthocyanidin reductase-like(ANRL)	Coenzyme binding	6	Se	Secondary metabolism process							0.61						0.47
18	3		A0A1U8NC64	Naringenin(NAR)	Deoxygenase activity	6	Se	Secondary metabolism process							0.43		0.66		0.65		0.52
15	5		A0A1U8NSL2	Cinnamyl alcohol dehydrogenase 9(CAD9)	Peroxisome	6	Se	Secondary metabolism process							0.55
9	4		D6N3G6	Chalcone-flavanone isomerase family protein(CHI)	Intramolecular lyase activity	6	Se	Secondary metabolism process							0.51				0.41		0.40
	20		A0A1U8IY48	Strictosidine synthase-like proteins-like 3-like	Strictosidine synthase activity	6	Se	Secondary metabolism process					0.52				0.61
44	89	Ribosome biogenesis process	A0A1U8I683	60S ribosomal protein L18-2-like(RPL18-2L)	Structural constituent of ribosome	13	Rb	Ribosome biogenesis process	Ribosome										0.4
39	90		A0A1U8JAM7	60S ribosomal protein L4-like(RPL4L)	Structural constituent of ribosome	13	Rb	Ribosome biogenesis process	Ribosome										0.56
35	91		A0A1U8JSD0	40S ribosomal protein S16(RPS16)	Structural constituent of ribosome	13	Rb	Ribosome biogenesis process	Ribosome						0.62
28	93		A0A1U8L3Q2	60S ribosomal protein L21-1(60SRPL21-1)	Structural constituent of ribosome	13	Rb	Ribosome biogenesis process	Ribosome						0.61
24	94		A0A1U8LK44	60S ribosomal protein L22-2(RPL22-2)	Structural constituent of ribosome	13	Rb	Ribosome biogenesis process	Ribosome						0.44
19	96		A0A1U8N216	60S ribosomal protein L8-3-like(RPL8-3L)	Structural constituent of ribosome	13	Rb	Ribosome biogenesis process	Ribosome						0.35						0.65
16	97		A0A1U8NNS8	40S ribosomal protein S14-3-like(RPS14-3L)	Structural constituent of ribosome	13	Rb	Ribosome biogenesis process	Ribosome						0.59						0.58
14	98		A0A1U8P1P2	40S ribosomal protein S2-2-like(RPS2-2)	Structural constituent of ribosome	13	Rb	Ribosome biogenesis process	Ribosome										0.62
13	99		A0A1U8P6Y6	60S ribosomal protein L18a(RPL18a)	Structural constituent of ribosome	13	Rb	Ribosome biogenesis process	Ribosome						0.57						0.56
	52		A0A1U8PQ91	60S acidic ribosomal protein P2-1-like	Structural constituent of ribosome	13	Rb	Ribosome biogenesis process	Ribosome				0.65								0.64
50	88	Protein folding process	A0A1U8HMA6	14-3-3 protein 6-like(14-3-3 6L)	Protein domain specific binding	13	Pf	Protein folding process							0.63
49	84		A0A1U8HS54	peptidyl-prolyl cis-trans isomerase(PPI)	Peptidyl-prolyl cis-trans isomerase activity	13	Pf	Protein folding process									0.62
46	85		A0A1U8I0J1	10 kDa chaperonin-like(CPN10L)	Unfolded protein binding	13	Pf	Protein folding process	Cytoplasm						0.55		0.56				0.65
31	92		A0A1U8KQZ7	Heat shock cognate protein 80-like(Hsc80L)	Protein folding and assembly	13	Pf	Protein folding process											0.65
22	95		A0A1U8MBN0	Heat shock 70 kDa protein(HSP70)	Potein bing activity	13	Pf	Protein folding process			0.51
1	87		Q8LK52	20 kDa chaperonin(Cpn)	Potein bing activity	13	Pf	Protein folding process	cytoplasm											1.83
	26		A0A1U8JCI9	Hsp70-Hsp90 organizing protein 3-like	Potein bing activity	13	Pf	Protein folding process	Cytoplasm				0.58	1.6
	48		A0A1U8NV91	Luminal-binding protein 5-like	Potein bing activity	13	Pf	Protein folding process	Cytoplasm												0.51
	49		A0A1U8NZL1	Activator of 90 kDa heat shock protein ATPase homolog	ATPase activator activity	13	Pf	Protein folding process	Cytoplasm						0.39
48	75	Oxidation-reduction process;	A0A1U8HU38	Monodehydroascorbate reductase-like(DHAR)	Oxidoreductase activity	13	Ox	Oxidation-reduction process;						1.85
47	76		A0A1U8HZ45	Probable peroxygenase 3	Oxidoreductase activity	13	Ox	Oxidation-reduction process;	Integral component of membrane					1.79
42	58		A0A1U8IMR7	Enoyl-[acyl-carrier-protein] reductase(NADH)	Oxidoreductase activity	13	Ox	Oxidation-reduction process;												1.56
40	79		A0A1U8J238	Glutathione S-transferase F9-like(GSTSF9)	Transferase activity	13	Ox	Oxidation-reduction process;					0.41						0.63
26	80		A0A1U8L9Z6	L-ascorbate peroxidase 6(APX6)	Peroxidase activity	13	Ox	Oxidation-reduction process;			0.63		0.56	2.25						1.79
23	81		A0A1U8LQY5	Glutathione S-transferase F6-like	Glutathione transferase activity	13	Ox	Oxidation-reduction process;		1.52							0.65
21	82		A0A1U8MZ87	L-ascorbate peroxidase(APX)	Oxidoreductase activity	13	Ox	Oxidation-reduction process;						1.55					0.65	1.71
6	68		I7CUD1	NADP-dependent D-sorbitol-6-phosphate dehydrogenase-like (S6PDH)	Aldose-6-phosphate reductase (NADPH) activity	13	Ox	Oxidation-reduction process;		1.71		1.57		1.80		2.89			0.59	1.63
3	83		Q3SAX1	Superoxide dismutase [Cu-Zn](Cu/ZnSOD)	Oxidoreductase activity	13	Ox	Oxidation-reduction process;					0.64			2.46
	27		A0A1U8KAZ0	Peroxisomal	Beta oxidation activity	13	Ox	Oxidation-reduction process;	Peroxisome	1.61
	30		A0A1U8LFR6	Glutathione S-transferase DHAR2-like(GSTDHAR2)	Glutathione dehydrogenase (ascorbate) activity	13	Ox	Oxidation-reduction process;									0.63
	54		A3F7Q2	Benzoquinone reductase	2-hydroxy-1,4-benzoquinone reductase activity	13	Ox	Oxidation-reduction process;	Peroxisome											1.55
	56		Q8L5K5	Fiber cell elongation protein(Ghfe1)	Flavin adenine dinucleotide binding	13	Ox	Oxidation-reduction process;	Integral component of membrane			2.31			0.30	3					0.62
11	100	Nucleotide processing and modification process	A0A1U8PWW5	Eukaryotic initiation factor 4A-8-like(eIF4A-8L)	Translation initiation factor activity;	9	Nb	Nucleotide processing and modification process
4	102		Q3LUM1	Elongation factor 1-alpha(EF-1α)	Translation initiation factor activity;	9	Nb	Nucleotide processing and modification process	Cytoplasm				0.64
	24		A0A1U8J9T2	Pentatricopeptide repeat-containing protein (PPRC)	RNA binding	9	Nb	Nucleotide processing and modification process	Cytoplasm				0.65
	29		A0A1U8L8F7	Staphylococcal nuclease domain-containing protein 1-like(SND1L)	RISC complex binding	9	Nb	Nucleotide processing and modification process	RISC complex									1.55
	33		A0A1U8LME2	Glutamate--tRNA ligase	Glutamate-tRNA ligase activity	9	Nb	Nucleotide processing and modification process	Cytoplasm									1.52
	34		A0A1U8LZK4	Histone H2A	DNA binding	9	Nb	Nucleotide processing and modification process	Nucleosome ;Nucleus						0.58				0.29		0.61
	35		A0A1U8M305	Histone H4	DNA binding	9	Nb	Nucleotide processing and modification process	Nucleosome;Nucleus		0.31				0.41		0.41		0.46		0.56
	38		A0A1U8M838	Nucleoside diphosphate kinase(NDPK)	Nucleoside diphosphate kinase activity;	9	Nb	Nucleotide processing and modification process							0.44
	47		A0A1U8NTG3	RNA polymerase II degradation factor 1-like	Protein binding	9	Nb	Nucleotide processing and modification process							0.61				0.55		0.64
45	77	Lipid metabolic process	A0A1U8I2Q8	Membrane steroid-binding protein 2-like(MSBP2L)	Phospholipid binding	6	Lp	Lipid metabolic process	Integral component of membrane		0.5		0.65				0.62
	6		A0A1U8K7G6	Phospholipase D(PLD)	Phospholipase activity/Calcium ion binding	6	Lp	Lipid metabolic process	Membrane				0.41	1.76				2.79		2.95
	9		A0A1U8IQ93	Malonate--CoA ligase-like	Malonyl-CoA synthetase activity;	6	Lp	Lipid metabolic process					0.61							1.75
	13		A0A1U8HGN1	Very-long-chain 3-oxoacyl-CoA reductase 1-like	Oxidoreductase activity	6	Lp	Lipid metabolic process	Integral component of membrane		0.55			2.66					0.41
	32		A0A1U8LIQ2	Non-specific lipid-transfer protein-like (nsLTPL)	Lipid-transfer activity	6	Lp	Lipid metabolic process										3.19			0.57
	57		Q9M6B8	Non-specific lipid-transfer protein(nsLTP)	Lipid binding	6	Lp	Lipid metabolic process	Cytoplasm										0.47	1.63
32	62	Glycolysis process	A0A1U8K5I9	Pyruvate dehydrogenase E1 component subunit beta-3(PDC-E1B3)	Catalytic activity	7	GL	Glycolysis process				1.55		2.06					0.59
27	63		A0A1U8L9M3	Pyruvate kinase(PK)	Pyruvate kinase activity	7	GL	Glycolysis process	Cytoplasm												0.51
20	65		A0A1U8N0A9	Enolase(E)	Phosphopyruvate hydratase activity	7	GL	Glycolysis process	Phosphopyruvate hydratase complex					1.86				1.78		1.82
17	86		A0A1U8ND61	ADP,ATP carrier protein 3	ATP:ADP antiporter activity	7	GL	Glycolysis process	Integral component of membrane; Mitochondrial inner membrane					2.28						1.76
	14		A0A1U8HIS5	Glyceraldehyde-3-phosphate dehydrogenase(GAPDH)	Oxidoreductase activity	7	GL	Glycolysis process						1.55
	50		A0A1U8P6Y5	Formate dehydrogenase, mitochondrial (FDH)	Oxidoreductase activity	7	GL	Glycolysis process	Mitochondrion		0.51					2.37
	55		A4L9H3	Alcohol dehydrogenase A (ALDHA)	Oxidoreductase activity	7	GL	Glycolysis process											0.5
	18	Proteolysis process	A0A1U8I8H1	Carboxypeptidase Y-like(CPY)	Carboxypeptidase activity	4	De	Proteolysis process						2.75				2.33		2.31
	28		A0A1U8KQB3	Metacaspase-4-like(MPS4L)	Cysteine protease	4	De	Proteolysis process	Cytoplasm									1.64	0.62
	31		A0A1U8LFS6	Proteasome subunit beta type(PSB)	Iron ion binding	4	De	Proteolysis process	Cytoplasm; Nucleus; Proteasome core complex		0.47		0.63	4.62						2.05
	41		A0A1U8N003	Protein aspartic protease in guard cell 1-like	Aspartic-type endopeptidase activity	4	De	Proteolysis process						1.60						1.51
37	70	Cytoskeleton organization process	A0A1U8JHY4	Profilin	Actin monomer binding	5	Cy	Cytoskeleton organization process		1.96		1.63				2.34				2.43
30	71		A0A1U8KR46	Cyclase-associated proteins（CAPs）	Actin binding	5	Cy	Cytoskeleton organization process						2.02
29	72		A0A1U8KS94	α-tubulin（TUA）	Structural constituent of cytoskeleton	5	Cy	Cytoskeleton organization process	Cytoplasm ; Microtubule							4.63
10	73		D2D2Z9	Annexin（ANN）	Calcium-dependent phospholipid binding	5	Cy	Cytoskeleton organization process	Cytoplasm; Nucleolus; Plasma membrane	1.71				2.54						3.81
2	74		Q6VAF8	β-tubulin-3（TUB-3）	Structural constituent of cytoskeleton	5	Cy	Cytoskeleton organization process	Cytoplasm; MIcrotubule	2.76				2.76		3.93				1.81
36	59	Carbohydrate metabolic process	A0A1U8JM46	Sucrose synthase-like(SUSL)	Sucrose synthase activity	10	Ch	Carbohydrate metabolic process						1.52						1.93
34	60		A0A1U8JX72	Phosphoglucomutase(PGM)	Intramolecular transferase activity	10	Ch	Carbohydrate metabolic process			0.5		0.37					1.59
33	61		A0A1U8JXD0	Pectinesterase (PME)	Aspartyl esterase activity	10	Ch	Carbohydrate metabolic process	Cell wall ; Extracellular region					11.29				1.86		17.45
12	66		A0A1U8PUZ8	Beta-galactosidase-like(β-Gal)	Beta-galactosidase activity	10	Ch	Carbohydrate metabolic process	Cytoplasm	2.39		1.82							0.42
7	67		G1FNX7	Sucrose synthase (SUS)	Synthase activity	10	Ch	Carbohydrate metabolic process	Cytoplasm					1.8				2.1		3.37
5	69		P93155	Cellulose synthase 8 (CESA8)	Synthase activity	10	Ch	Carbohydrate metabolic process	Integral component of membrane ; plasma membrane					4.43		2.57				5.45
	22		A0A1U8J0C9	Endoglucanase(EG)	Cellulase activity	10	Ch	Carbohydrate metabolic process	Integral component of membrane	2.22				2.03		4.31		1.72		3.56
	36		A0A1U8M685	Acid beta-fructofuranosidase-like	Sucrose alpha-glucosidase activity	10	Ch	Carbohydrate metabolic process	Integral component of membrane					1.66
	37		A0A1U8M7X9	Glucan endo-1,3-beta-glucosidase 8-like	Hydrolase activity	10	Ch	Carbohydrate metabolic process	Integral component of membrane						0.42			1.88			0.66
	44		D2D2Z3	UDP-D-glucose dehydrogenase (UDPGDH )	Isomerase activity	10	Ch	Carbohydrate metabolic process												1.74
41	78	Cadmium ion response process	A0A1U8IZY2	Calcium-dependent protein kinase1 (CPK1)	Kinase activity	4	Ca	Response to calcium process						1.68
	15		A0A1U8HKZ3	Calreticulin-like(CRTL)	Calcium ion binding	4	Ca	Response to calcium process	Endoplasmic reticulum				0.56	1.55						1.81
	23		A0A1U8J5B7	Calmodulin-7(CaM7)	Calcium ion binding	4	Ca	Response to calcium process						1.55						1.63
	43		A0A1U8N4C1	Probable calcium-binding protein CML13	Calcium ion binding	4	Ca	Response to calcium process						1.69
	12	Amino acid catabolic process;	A0A0A7R535	Mitogen-activated protein kinase(MAPK)	MAP kinase activity	5	An	Amino acid catabolic process;	Intracellular										0.5
	25		A0A1U8JC30	Fumarylacetoacetase-like(FALL)	Fumarylacetoacetase activity	5	An	Amino acid catabolic process;							0.56
	45		A0A1U8NAM1	Glutamate decarboxylase(GAD)	Glutamate decarboxylase activity	5	An	Amino acid catabolic process;													0.61
	46		A0A1U8NES8	Glutamine synthetase(GS)	Glutamate-ammonia ligase activity	5	An	Amino aicd metabolic process										1.52
	53		A0A1U8PUU8	Glycine cleavage system P protein	Glycine dehydrogenase (decarboxylating) activity	5	An	Amino acid catabolic process;	Mitochondrion								0.59
	10		A0A1U8ISN8	Uncharacterized protein									0.46
	11	Electron transport chain	A0A1U8N1F3	Uncharacterized protein	Electron carrier activity			Electron transport chain
	16		A0A1U8I1V4	Uncharacterized protein														1.64
																	f
